# Supplementary material for: Remarkable thermal stability of light-induced Ru–ON linkage isomers in mixed salts of a ruthenium amine complex with a trans-ON–Ru–F coordinate
Source: Royal Society of Chemistry journal article supplement (doi:10.1039/d0dt04323k), 2021-01-01
Supplement: d0dt04323k1.pdf [file d0dt04323k1.pdf]

**Remarkable thermal stability of light-induced Ru-ON linkage isomers in mixed salts of ammine  
ruthenium complex with *trans*-ON-Ru-F coordinate**

Artem A. Mikhailov\*<sup>a</sup>, Taisiya S. Sukhikh<sup>a</sup>, Natalia V. Kuratieva<sup>a</sup>, Denis P. Pishchur<sup>a</sup> and Gennadiy A. Kostin<sup>a</sup>

<sup>a</sup> Nikolaev Institute of Inorganic Chemistry, Siberian Branch of the Russian Academy of Sciences, 3 Acad. Lavrentiev Avenue, Novosibirsk 630090, Russian Federation

**Table S1.** Experimental and refinement details.

| Complex                                     | (H <sub>3</sub> O)[RuNO(NH <sub>3</sub> ) <sub>4</sub> F](NO <sub>3</sub> ) <sub>1.5</sub> F <sub>1.5</sub> ·0.5H <sub>2</sub> O (I) | [RuNO(NH <sub>3</sub> ) <sub>4</sub> F](ClO <sub>4</sub> )Cl (II) |
|---------------------------------------------|--------------------------------------------------------------------------------------------------------------------------------------|-------------------------------------------------------------------|
| Empirical formula                           | F <sub>2.5</sub> H <sub>16</sub> N <sub>6.5</sub> O <sub>7</sub> Ru                                                                  | Cl <sub>2</sub> FH <sub>12</sub> N <sub>5</sub> O <sub>5</sub> Ru |
| Formula weight                              | 367.73                                                                                                                               | 353.12                                                            |
| Temperature/K                               | 150(2)                                                                                                                               | 150(2)                                                            |
| Crystal system                              | tetragonal                                                                                                                           | monoclinic                                                        |
| Space group                                 | <i>I4/m</i>                                                                                                                          | <i>P2<sub>1</sub>/n</i>                                           |
| a/Å                                         | 16.8917(6)                                                                                                                           | 11.4314(17)                                                       |
| b/Å                                         | 16.8917(6)                                                                                                                           | 7.4565(11)                                                        |
| c/Å                                         | 7.7823(5)                                                                                                                            | 12.5251(17)                                                       |
| α/°                                         | 90                                                                                                                                   | 90                                                                |
| β/°                                         | 90                                                                                                                                   | 101.184(4)                                                        |
| γ/°                                         | 90                                                                                                                                   | 90                                                                |
| Volume/Å <sup>3</sup>                       | 2220.5(2)                                                                                                                            | 1047.3(3)                                                         |
| Z                                           | 8                                                                                                                                    | 4                                                                 |
| ρ <sub>calc</sub> /g/cm <sup>3</sup>        | 2.176                                                                                                                                | 2.239                                                             |
| μ/mm <sup>-1</sup>                          | 1.488                                                                                                                                | 2.030                                                             |
| F(000)                                      | 1440.0                                                                                                                               | 696.0                                                             |
| Crystal size/mm <sup>3</sup>                | 0.35 × 0.28 × 0.15                                                                                                                   | 0.200 × 0.130 × 0.090                                             |
| Radiation                                   | MoKα (λ = 0.71073)                                                                                                                   | MoKα (λ = 0.71073)                                                |
| 2θ range for data collection/°              | 4.822 to 57.568                                                                                                                      | 4.418 to 61.122                                                   |
| Index ranges                                | -22 ≤ h ≤ 22,<br>-22 ≤ k ≤ 22,<br>-10 ≤ l ≤ 10                                                                                       | -15 ≤ h ≤ 16,<br>-9 ≤ k ≤ 10,<br>-14 ≤ l ≤ 17                     |
| Reflections collected                       | 16232                                                                                                                                | 9768                                                              |
| Independent reflections                     | 1550 [R <sub>int</sub> = 0.0287,<br>R <sub>sigma</sub> = 0.0133]                                                                     | 3206 [R <sub>int</sub> = 0.0202,<br>R <sub>sigma</sub> = 0.0196]  |
| Data/restraints/parameters                  | 1550/0/94                                                                                                                            | 3206/0/131                                                        |
| Goodness-of-fit on F <sup>2</sup>           | 1.248                                                                                                                                | 1.029                                                             |
| Final R indexes [I > 2σ (I)]                | R <sub>1</sub> = 0.0459, wR <sub>2</sub> = 0.1130                                                                                    | R <sub>1</sub> = 0.0178, wR <sub>2</sub> = 0.0433                 |
| Final R indexes [all data]                  | R <sub>1</sub> = 0.0466, wR <sub>2</sub> = 0.1134                                                                                    | R <sub>1</sub> = 0.0211, wR <sub>2</sub> = 0.0446                 |
| Largest diff. peak/hole / e Å <sup>-3</sup> | 1.08/-1.47                                                                                                                           | 0.33/-0.51                                                        |

**Table S2.** Selected bond lengths (Å) and angles (°) in obtained complexes.

| Distance/angle | I        | II       |
|----------------|----------|----------|
| N1-O1          | 1.154(8) | 1.137(2) |
| Ru1-N1         | 1.721(6) | 1.736(2) |
| Ru1-N2         | 2.088(4) | 2.102(1) |
| Ru1-N3         | 2.089(4) | 2.113(1) |
| Ru1-N4         | 2.088(4) | 2.111(1) |
| Ru1-N5         | 2.089(4) | 2.093(1) |
| Ru1-F1         | 1.930(4) | 1.944(1) |
| Ru1-N1-O1      | 178.9(7) | 176.1(1) |
| F1-Ru1-N1      | 180.0(2) | 177.5(1) |
| N2-Ru1-F1      | 85.6(2)  | 85.5(1)  |
| N3-Ru1-F1      | 85.3(1)  | 85.3(1)  |
| N4-Ru1-F1      | 85.6(2)  | 85.6(1)  |
| N5-Ru1-F1      | 85.3(1)  | 85.2(1)  |

**Table S3.** Found hydrogen bond lengths (Å) and angles (°).

| Distance (D...A), angle (D-H...A) |       |       |          |       |       |
|-----------------------------------|-------|-------|----------|-------|-------|
|                                   | I     |       | II       |       |       |
| N2...O2                           | 3.108 | 148.0 | N2...Cl2 | 3.254 | 174.8 |
| N2...O3                           | 3.040 | 167.6 | N2...Cl2 | 3.311 | 172.5 |
| N2...F1                           | 2.887 | 118.4 | N2...O3  | 3.154 | 116.1 |
| N2...F3                           | 3.291 | 173.5 | N2...O4  | 3.042 | 163.1 |
| N3...O2                           | 3.089 | 164.6 | N3...Cl2 | 3.371 | 165.6 |
| N3...O3                           | 3.006 | 161.8 | N3...Cl2 | 3.362 | 173.1 |
| N3...O6                           | 3.209 | 142.7 | N3...O5  | 3.262 | 123.7 |
|                                   |       |       | N3...O4  | 3.098 | 153.6 |
|                                   |       |       | N4...Cl2 | 3.586 | 159.9 |
|                                   |       |       | N4...F1  | 3.006 | 160.7 |
|                                   |       |       | N4...O5  | 3.041 | 111.6 |
|                                   |       |       | N4...O2  | 3.072 | 153.2 |
|                                   |       |       | N5...Cl2 | 3.451 | 166.2 |
|                                   |       |       | N5...F1  | 2.955 | 163.2 |
|                                   |       |       | N5...O2  | 3.018 | 147.2 |
|                                   |       |       | N5...O2  | 2.926 | 113.7 |

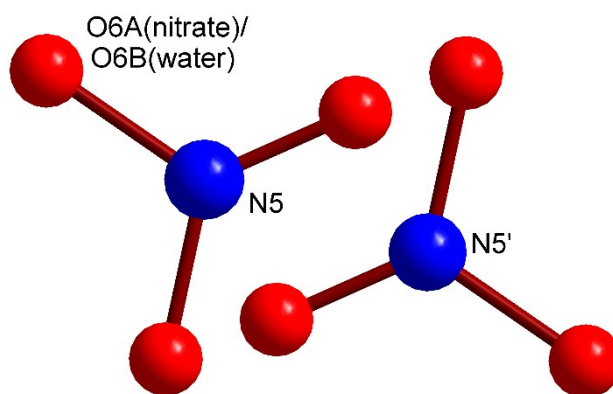

**Fig. S1.** Disordered nitrate and water molecule in the structure of I. Symmetry code for (') is  $-x, 1-y, z$ .

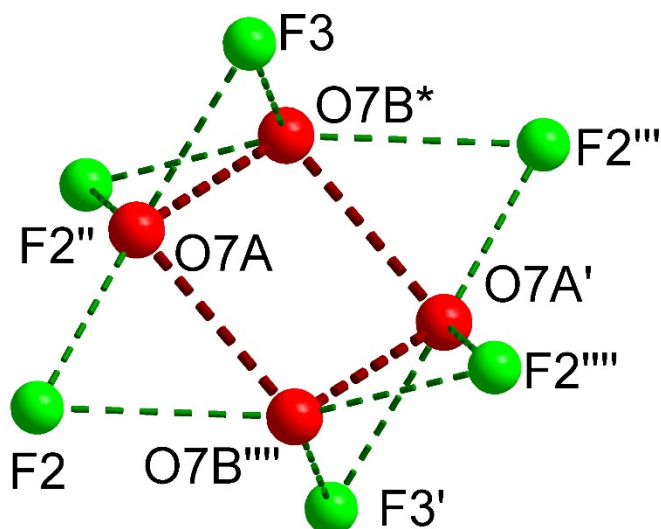

**Fig. S2.** Variant of the arrangement of the disordered  $\text{H}_3\text{O}^+$  cations forming hydrogen bond with  $\text{F}^-$  in the structure of I. Symmetry codes: (')  $-x, -y, 1-z$ ; (")  $y, -x, z$ ; (""')  $-x, -y, z$ ; (""")  $-y, x, z$ ; (\*)  $y, -x, 1-z$ . Green dashed lines indicate the  $\text{O}-\text{H}\cdots\text{F}$  contacts, brown dashed lines indicate the  $\text{O}-\text{H}\cdots\text{O}$  contacts. Hydrogen atoms were not localized due to the strong disorder of the  $\text{H}_3\text{O}^+$  cations.

**Table S4.** The complexes of  $[\text{RuNO}(\text{NH}_3)_4\text{F}]^{2+}$  ion (A) with different anions. The space groups highlighted by the **bold** are non-centrosymmetric. The percentage of the certain intermolecular interaction is calculated using the two-dimensional fingerprints of Hirshfeld surface of the  $[\text{RuNO}(\text{NH}_3)_4\text{F}]^{2+}$ .

| Complex                           | Space group                                            | N-H $\cdots$ All, % | N-H $\cdots$ Halogen, % | N-H $\cdots$ O, % | Ref.         |
|-----------------------------------|--------------------------------------------------------|---------------------|-------------------------|-------------------|--------------|
| <b>I</b>                          | <i>I4/m</i>                                            | 76                  | 18                      | 52                | Present work |
| <b>II</b>                         | <i>P2<sub>1</sub>/n</i>                                | 76                  | 16                      | 35                | Present work |
| A(ClO <sub>4</sub> ) <sub>2</sub> | <i>p</i> $\bar{1}$                                     | 74                  | 5                       | 67                | 1            |
| A(SiF <sub>6</sub> )              | <b><i>Pn</i></b>                                       | 76                  | 56                      | 6                 | 2            |
| A[PdCl <sub>4</sub> ]             | <b><i>Cmc2<sub>1</sub></i></b>                         | 77                  | 52                      | 8                 | 1            |
| A[PtCl <sub>4</sub> ]             | <b><i>Cmc2<sub>1</sub></i></b>                         | 76                  | 50                      | 7                 | 1            |
| A[PtCl <sub>6</sub> ]             | <b><i>P2<sub>1</sub>2<sub>1</sub>2<sub>1</sub></i></b> | 76                  | 59                      | 6                 | 1            |

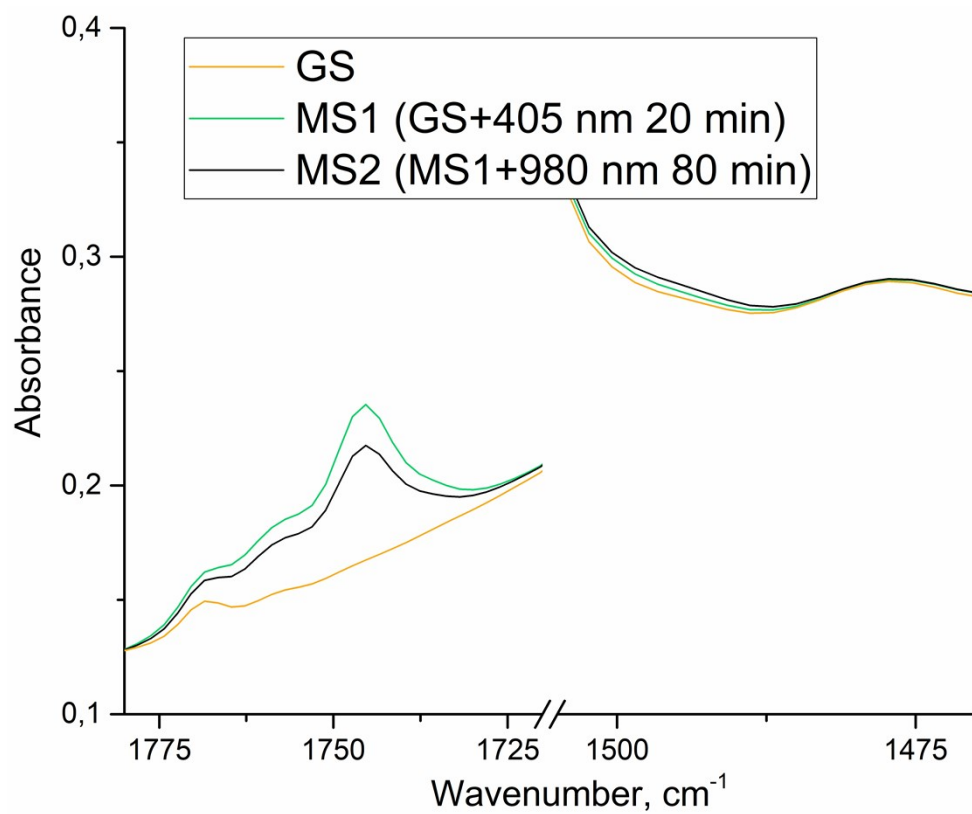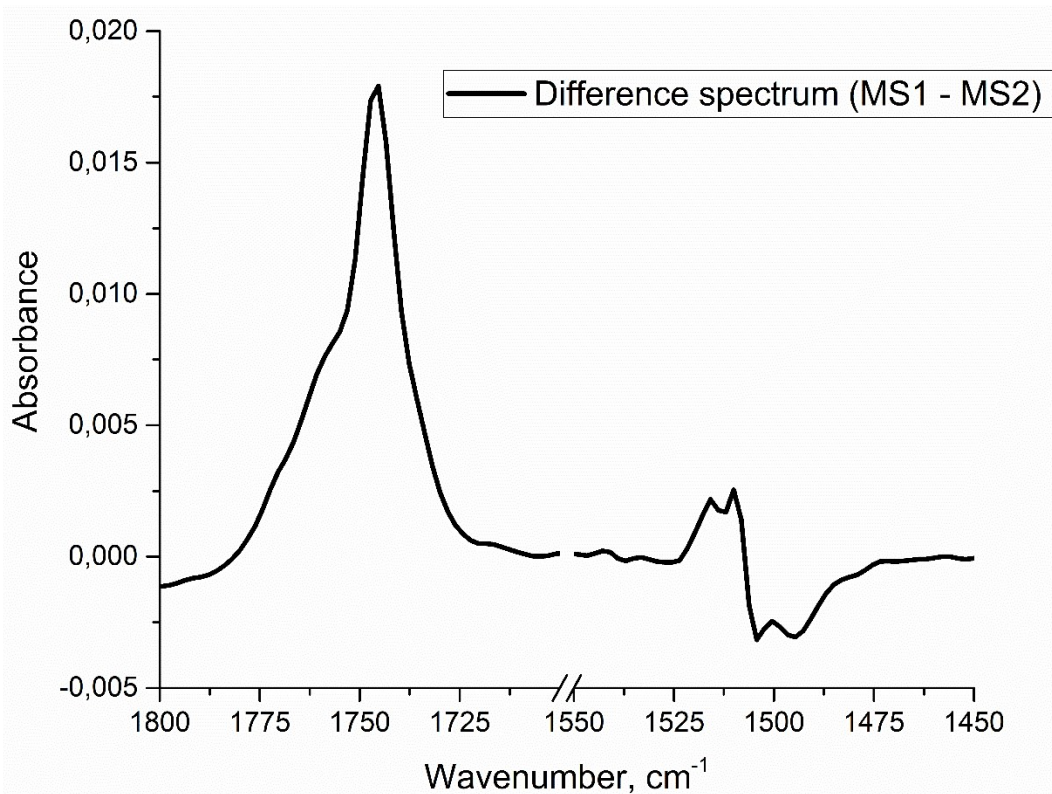

**Fig. S3.** IR-spectra of the I complex before (GS), after light exposure at 405 nm 270 mW (MS1) and after subsequent irradiation at 980 nm 470 mW at 80 K, and the difference spectrum of MS1 and MS2 (MS1 – MS2).

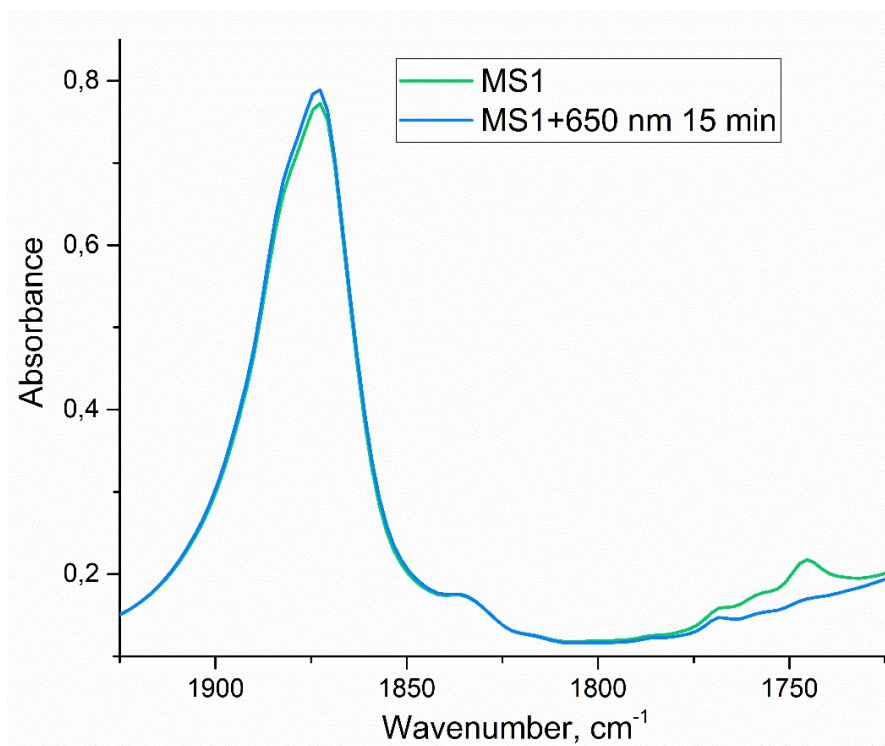

**Fig. S4.** The IR spectrum of I complex with MS1 (green line) and the spectrum after irradiation at 650 nm 60 mW (blue line).

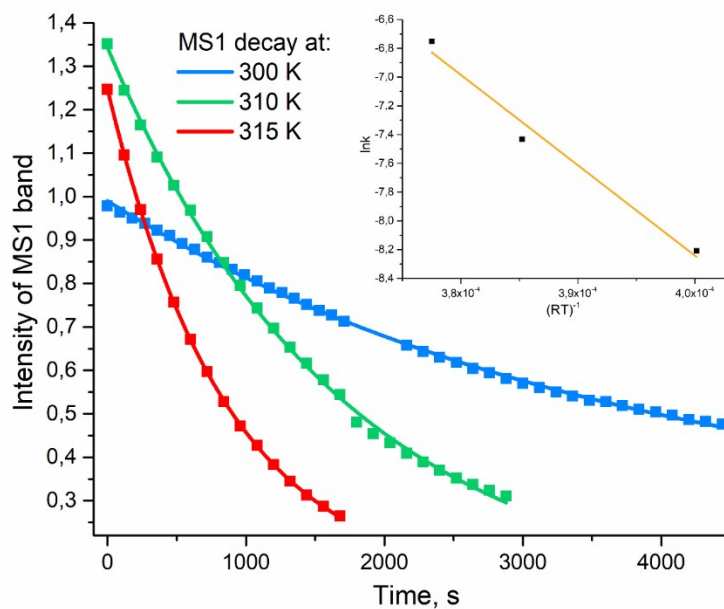

**Fig. S5.** The decay of the  $\nu(\text{ON})$  band of MS1 in II at 300, 310 and 315 K fitted by the one-exponential function and corresponding Arrhenius plot in the insert.

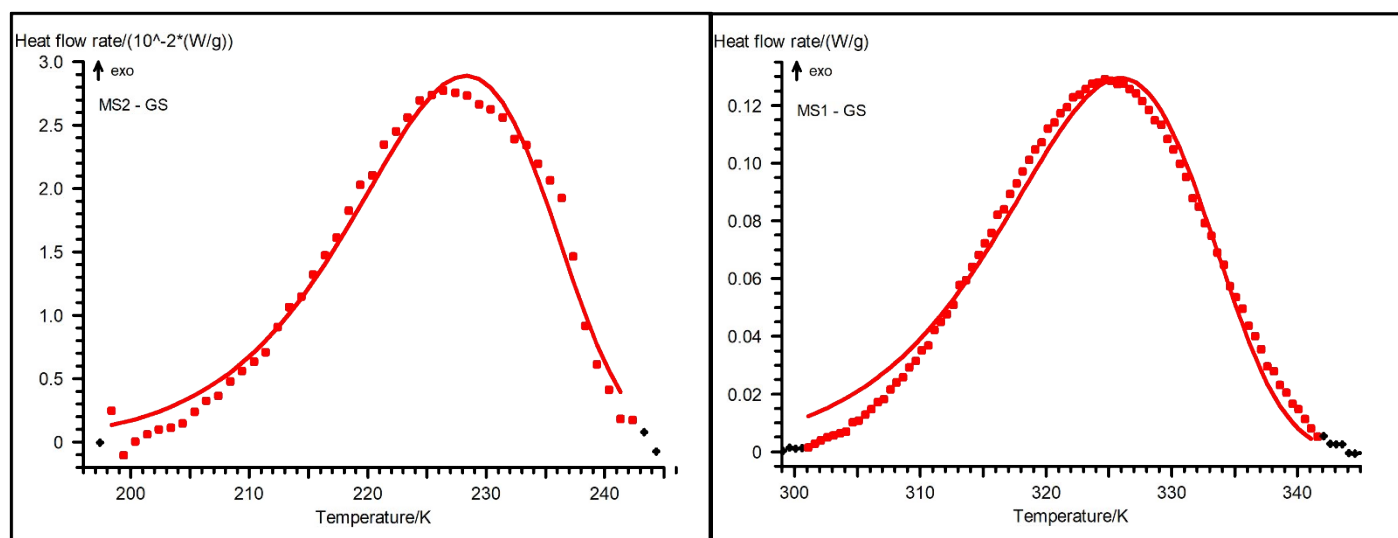

**Fig. S6.** The DSC curves of the MS2→GS (left panel) and MS1→GS (right panel) reactions of **I** measured by DSC fitted by the kinetic of the first order.

**Table S5.** The chosen bond distances; positions of  $\nu(\text{NO})$  bands of GS, MS1 and MS2; populations of MS1 and MS2; decay temperatures ( $T_d$ ) of MS1 and MS2 and volumes of Hirshfeld surfaces (VHS) of the NO ligand in the complexes of  $[\text{RuNO}(\text{NH}_3)_4\text{F}]^{2+}$  ion (A) with different anions.

|                                   | Ru-NO, Å              | N-O, Å                | Ru-F, Å               | $\nu(\text{NO})_{\text{GS}}$ , $\text{cm}^{-1}$ | $\nu(\text{NO})_{\text{MS1}}$ , $\text{cm}^{-1}$ | $\nu(\text{NO})_{\text{MS2}}$ , $\text{cm}^{-1}$ | MS1, % | MS2, % | $T_d(\text{MS1})$ , K | $T_d(\text{MS2})$ , K | VHS, Å <sup>3</sup> |
|-----------------------------------|-----------------------|-----------------------|-----------------------|-------------------------------------------------|--------------------------------------------------|--------------------------------------------------|--------|--------|-----------------------|-----------------------|---------------------|
| A[PtCl <sub>4</sub> ]             | 1.74(2)               | 1.15(2)               | 1.96(1)               | 1895                                            | 1762                                             | -                                                | 1      | -      | -                     | -                     | 22.14               |
| A[PtCl <sub>6</sub> ]             | 1.728(5)              | 1.153(7)              | 1.917(4)              | 1874                                            | 1745                                             | -                                                | 2      | -      | -                     | -                     | 22.49               |
| A(SiF <sub>6</sub> )              | 1.719(2)              | 1.144(2)              | 1.938(1)              | 1902                                            | 1769                                             | 1545                                             | 10     | 3      | 292                   | 206                   | 22.31               |
| A(ClO <sub>4</sub> ) <sub>2</sub> | 1.740(3);<br>1.736(3) | 1.138(4);<br>1.141(4) | 1.927(2);<br>1.937(2) | 1874                                            | 1747                                             | 1494                                             | 7      | 1      | 303                   | -                     | 29.28;<br>29.18     |
| <b>I</b>                          | 1.721(6)              | 1.154(8)              | 1.930(4)              | 1873                                            | 1745                                             | 1494                                             | 6      | 2      | 305                   | 207                   | 23.22               |
| A[PdCl <sub>4</sub> ]             | 1.728(5)              | 1.149(5)              | 1.938(3)              | 1896                                            | 1755                                             | -                                                | 1      | -      | 307                   | -                     | 23.01               |
| <b>II</b>                         | 1.736(2)              | 1.137(2)              | 1.944(1)              | 1873                                            | 1745                                             | 1494                                             | 9      | 4      | 313                   | 204                   | 24.35               |

**Table S6.** The populations of MS1 and intermolecular contacts shorter than the sum of the van der Waals radii (contacting atoms are underlined) of NO ligand in the complexes of  $[\text{RuNO}(\text{NH}_3)_4\text{F}]^{2+}$  ion (A) with different anions.

|                                                               | MS1, % | Contacts         |               | Ref.         |
|---------------------------------------------------------------|--------|------------------|---------------|--------------|
| A(SiF <sub>6</sub> )                                          | 10     | <u>NO</u> ...H   | 2.66          | 2            |
|                                                               |        | <u>NO</u> ...F   | 2.66          |              |
|                                                               |        | <u>NO</u> ...F   | 2.86          |              |
|                                                               |        | <u>NO</u> ...F   | 2.97          |              |
| II                                                            | 9      | <u>NO</u> ...O   | 2.90          | Present work |
|                                                               |        | <u>NO</u> ...O   | 2.98          |              |
|                                                               |        | <u>NO</u> ...O   | 2.95          |              |
|                                                               |        | <u>NO</u> ...O   | 3.06          |              |
| A(ClO <sub>4</sub> ) <sub>2</sub>                             | 7      | <u>NO</u> ...O   | 2.91;<br>2.92 | 1            |
|                                                               |        | <u>NO</u> ...O   | 3.04;<br>3.01 |              |
|                                                               |        | <u>NO</u> ...O   | 2.94;<br>3.01 |              |
|                                                               |        | <u>NO</u> ...O   | 2.97;<br>3.04 |              |
| I                                                             | 6      | <u>NO</u> ...O*  | 2.68          | Present work |
|                                                               |        | <u>NO</u> ...O   | 2.83          |              |
|                                                               |        | <u>NO</u> ...O   | 2.83          |              |
|                                                               |        | <u>NO</u> ...N   | 2.99          |              |
|                                                               |        | <u>NO</u> ...O*  | 2.72          |              |
|                                                               |        | <u>NO</u> ...O   | 3.00          |              |
|                                                               |        | <u>NO</u> ...O   | 3.00          |              |
| A[PtCl <sub>6</sub> ]                                         | 2      | <u>NO</u> ...Cl  | 3.12          | 1            |
|                                                               |        | <u>NO</u> ... Cl | 3.17          |              |
|                                                               |        | <u>NO</u> ... Cl | 3.17          |              |
|                                                               |        | <u>NO</u> ... Cl | 3.30          |              |
| A[PtCl <sub>4</sub> ]                                         | 1      | <u>NO</u> ...Cl  | 3.17          | 1            |
|                                                               |        | <u>NO</u> ...Cl  | 3.17          |              |
|                                                               |        | <u>NO</u> ...Cl  | 3.29          |              |
|                                                               |        | <u>NO</u> ...Cl  | 3.29          |              |
| A[PdCl <sub>4</sub> ]                                         | 1      | <u>NO</u> ...Cl  | 3.19          | 1            |
|                                                               |        | <u>NO</u> ...Cl  | 3.19          |              |
| *Short distances correspond to the disordered water molecule. |        |                  |               |              |

## References

- 1 A. A. Mikhailov, V. Y. Komarov, A. S. Sukhikh, D. P. Pishchur, D. Schaniel and G. A. Kostin, *New J. Chem.*, 2020, **44**, 18014–18024.
- 2 A. Mikhailov, V. Vuković, C. Kijatkin, E. Wenger, M. Imlau, T. Woike, G. Kostin and D. Schaniel, *Acta Crystallogr. Sect. B Struct. Sci. Cryst. Eng. Mater.*, 2019, **75**, 1152–1163.
